# Supplementary material
Source: MDPI journal article supplement (https://www.mdpi.com/2673-1924/2/2/23)
Supplement: s1 [file s1]

## Supplementary Materials

# Offshore Geological Hazards: Charting the Course of Progress and Future Directions

### Figure Caption for Movie

Movie presenting the numerical simulation of the tsunami wave evolution from its generation to its coastal impact in the Gulf of Cadiz. The Tsunami-HySEA model was used [1]. The seismic source considered is a combination of the Horseshoe and Marques de Pombal faults (Baptista, M.A; per. Comm.; [2]). The tsunamigenic fault composed by those two segments were described by the Okada's parameters ([3], Table S1 in Supplementary Materials), which are considered by the Tsunami-HySEA model in the computation of the initial seafloor deformation. The bathymetry comes from EMODnet source (<https://www.emodnet-bathymetry.eu/>; accessed on 30 August 2020).

### Table in Supplementary Materials

**Table S1.** Okada's parameters [3] describing the two fault segments involving of the Horseshoe and Marques de Pombal faults as source for the tsunami modelling.

| Segment Fault     | East Long | North Lat | Depth (km) | L (km) | W (km) | Strike | Dip  | Rake | Slip | Mw  |
|-------------------|-----------|-----------|------------|--------|--------|--------|------|------|------|-----|
| Marqués de Pombal | 10.25     | 36.64     | 5          | 120.0  | 80.0   | 20.0   | 35.0 | 90.0 | 12   | 8.8 |
| Horseshoe         | 10.32     | 35.92     | 5          | 170.0  | 100.0  | 42.0   | 35.0 | 90   | 14   |     |

### References

1. Macías, J.; Castro, M.J.; Escalante, C. Performance assessment of the Tsunami-HySEA model for NTHMP tsunami currents benchmarking. Laboratory data. *Coast. Engin.* **2020**, *158*, 103667, doi:10.1016/j.ocemod.2020.101645.
2. Omira, R.; Baptista, M.A.; Miranda, J.M. Evaluating tsunami impact on the Gulf of Cadiz coast (Northeast Atlantic). *Pure Appl. Geophys.* **2011**, *168*, 1033–1043, doi:10.1007/s00024-010-0217-7.
3. Okada, Y. Internal deformation due to shear and tensile faults in a half-space. *Bull. Seismolo. Soc. America* **1992**, *82*, 1018–1040.
